# Supplementary material for: Cryopreservation of Duckweed Genetic Diversity as Model for Long-Term Preservation of Aquatic Flowering Plants
Source: MDPI journal article supplement (doi:10.3390/plants12183302), 2023-09-18
Supplement: s1 [file s1]

**Table S1.** Effect of supplemented compounds used in different solutions on cryopreservation results of *Le. gibba* 7742 after rewarming.

|    | Tested substances                                                                                                                                     | Pre-cultivation | Cryoprotection (PVS3) | Washing | Re-growth | Effect on bleaching delay after rewarming                                                                                     |
|----|-------------------------------------------------------------------------------------------------------------------------------------------------------|-----------------|-----------------------|---------|-----------|-------------------------------------------------------------------------------------------------------------------------------|
| 1  | 1 mM ATP                                                                                                                                              | -               | -                     | -       | +         | No delay, getting brown during 1-2 days                                                                                       |
| 2  | 0.1 g/l casein hydrolysate                                                                                                                            | +               | +                     | +       | +         | No delay, getting brown during 2-3 days                                                                                       |
| 3  | 0.5 g/l glutamine,<br>0.5 g/l cysteine,<br>0.5 g/l proline                                                                                            | -               | -                     | -       | +         | No delay, getting brown during 2-3 days                                                                                       |
| 4  | 0.5 g/l PVP10000                                                                                                                                      | -               | -                     | +       | +         | Up to 17-20 days (in combination with attenuated illumination regime and working on ice in protected against light condition) |
| 5  | 1 mM dithiothreitol                                                                                                                                   | -               | +                     | +       | +         | Up to 30 days (in combination with attenuated illumination regime and working on ice in protected against light condition)    |
| 6  | 3 mM Na <sub>2</sub> S <sub>2</sub> O <sub>3</sub>                                                                                                    | -               | +                     | +       | +         | No delay                                                                                                                      |
| 7  | 30 µM Ag <sub>2</sub> S <sub>2</sub> O <sub>3</sub>                                                                                                   | -               | -                     | +       | +         | No delay                                                                                                                      |
| 8  | 10 mM glutathione                                                                                                                                     | -               | -                     | +       | +         | No delay, getting brown during 2-3 days                                                                                       |
| 9  | 0.4 mg/l gibberellic acid                                                                                                                             | -               | -                     | -       | +         | No delay                                                                                                                      |
| 10 | 1 mg/l 6-benzylaminopurine<br>+ 0.3 mg/l indole-3-acetic acid<br>+ 0.4 mg/l gibberellic acid                                                          | -               | -                     | -       | +         | No delay                                                                                                                      |
| 11 | 1 mg/l 6-benzylaminopurine<br>+ 0.3 mg/l indole-3-acetic acid<br>+ 0.4 mg/l gibberellic acid<br>+ 30 µM Ag <sub>2</sub> S <sub>2</sub> O <sub>3</sub> | -               | -                     | -       | +         | No delay                                                                                                                      |

**Table S2.** Regrowth of *Le. gibba* 7742 depends on pre-culture condition.

|   | Medium                    | Condition                                                                                                                                                     | Number of regrowth events after cryo, per cryo-tube (25-50 fronds in cryo-tube) |
|---|---------------------------|---------------------------------------------------------------------------------------------------------------------------------------------------------------|---------------------------------------------------------------------------------|
| 1 | SH, 5 g/l (15 mM) sucrose | Standard growth condition: in climate chamber (12/12h light/dark cycle, PPFD 60 µmol·m <sup>-2</sup> ·s <sup>-1</sup> , 25°C/22°C for the light/dark periods) | 0 - 1                                                                           |
| 2 | SH, 5 g/l (15 mM) sucrose | Cold: in fridge (4°C, darkness)                                                                                                                               | 0                                                                               |
| 3 | SH, 5 g/l (15 mM) sucrose | Imitation of night frost: in climate chamber (16/8h light/dark cycle, PPFD 60 µmol·m <sup>-2</sup> ·s <sup>-1</sup> , 25°C/-1°C for the light/dark periods)   | 0 - 1                                                                           |
| 4 | SH, 0.4 M sucrose         | Standard growth condition: in climate chamber (12/12h light/dark cycle, PPFD 60 µmol·m <sup>-2</sup> ·s <sup>-1</sup> , 25°C/22°C for the light/dark periods) | 2 - 4                                                                           |
| 5 | SH, 0.4 M sucrose         | Cold: in fridge (4°C, darkness)                                                                                                                               | 0 0                                                                             |
| 6 | SH, 0.4 M sucrose         | Imitation of night frost: in climate chamber (16/8h light/dark cycle, PPFD 60 µmol·m <sup>-2</sup> ·s <sup>-1</sup> , 25°C/-1°C for the light/dark periods)   | 0 - 1                                                                           |

SH – nutrient medium Schenk and Hildebrand, PPFD - the photosynthetic photon flux density.

**Table S3.** Parameters of chlorophyll fluorescence and photosynthesis performance for intact *Le. gibbba* 7742 culture.

| Parameter | F <sub>0</sub> | F <sub>m</sub> | F <sub>v</sub> | F <sub>v</sub> /F <sub>m</sub> | Φ <sub>PSII</sub> |
|-----------|----------------|----------------|----------------|--------------------------------|-------------------|
| Value     | 92.7±15.8      | 441.5±86.2     | 348.9±71.4     | 0.8±0.05                       | 0.7±0.05          |

**Table S4.** Distribution of potential regulatory DNA cis-elements in promoter region of *CBF* genes in *A. thaliana* and duckweed.

| cis-element                                      | <i>AtCBF1</i> | <i>AtCBF2</i> | <i>AtCBF3</i> | <i>LgCBF1</i> | <i>LgCBF2</i> | <i>LgCBF3</i> | <i>LpCBF1</i> | <i>LpCBF2</i> | <i>SpCBF1</i> | <i>SpCBF2</i> |
|--------------------------------------------------|---------------|---------------|---------------|---------------|---------------|---------------|---------------|---------------|---------------|---------------|
| G-box                                            | 2             | 1             | 2             | 3             | 1             | 2             | 1             | 5             | 2             | 2             |
| E-box                                            | 6             | 5             | 10            | 6             | 9             | 18            | 8             | 11            | 10            | 11            |
| EE, evening element*                             | 2             | 3             | 3             | 0             | 0             | 0             | 0             | 0             | 0             | 0             |
| CGCG-box, CAMTA binding site**                   | 1             | 2             | 3             | 7             | 4             | 5             | 12            | 4             | 4             | 4             |
| CBS, CCA1 binding site*                          | 7             | 6             | 7             | 3             | 5             | 4             | 1             | 3             | 1             | 2             |
| MYB*                                             | 6             | 5             | 7             | 1             | 2             | 0             | 3             | 4             | 2             | 9             |
| BRRE, brassinosteroid response element           | 3             | 0             | 0             | 0             | 0             | 1             | 7             | 5             | 9             | 1             |
| TIME, TOC1 morning element*                      | 21            | 13            | 24            | 4             | 7             | 14            | 11            | 16            | 9             | 7             |
| ABRE, abscisic acid responsiveness               | 4             | 2             | 7             | 4             | 4             | 6             | 6             | 5             | 15            | 6             |
| MeJA-responsiveness**                            | 3             | 0             | 2             | 5             | 3             | 4             | 11            | 3             | 10            | 4             |
| ERE, Ethylene-responsive element**               | 1             | 0             | 1             | 4             | 1             | 3             | 1             | 0             | 0             | 0             |
| MYC, Water stress and dehydration responsiveness | 1             | 3             | 7             | 2             | 2             | 10            | 1             | 1             | 0             | 3             |
| TCA-element, salicylic acid responsiveness*      | 1             | 2             | 1             | 0             | 1             | 0             | 2             | 2             | 1             | 0             |
| TGA-element, auxin-responsive element            | 0             | 1             | 1             | 1             | 0             | 1             | 1             | 1             | 0             | 2             |

Reduced (\*) and increased (\*\*) number of *cis*-elements compared to *Arabidopsis* are marked in blue and red, respectively.

**Table S5.** List of RT-qPCR primers used for evaluating expression of the *CBF* genes in *Le. gibba*, *La. punctata* and *Sp. polyrhiza*.

| Gene              | Forward primer       | Reverse primer        | PCR product, length in bp |
|-------------------|----------------------|-----------------------|---------------------------|
| <i>LgCBF1</i>     | CTCTCCGCCTCATCACGTC  | GCAAGGATATGCCGCGTC    | 137                       |
| <i>LgCBF2</i>     | TCCGTCTGAACTAAGAGGCG | ACACATAGTAGCTCCCAACGG | 100                       |
| <i>LgCBF3</i>     | CGATAGTGGAGAGGTGCCA  | CAGCCATGCCGTTGTATTGA  | 102                       |
| <i>LgHistone3</i> | CCGCAAGTACCAGAAGAGCA | AGGTATGCTTCGGCTGCTTC  | 147                       |
| <i>LgActin</i>    | TGAGCATGGAATCGTCAGCA | GCCTTCGGATTCAGAGGAGC  | 129                       |
| <i>LpCBF1</i>     | TCCAAGGAACTCTCGGCCAT | GTGGCGTAAGTCTCCTCGTC  | 119                       |
| <i>LpCBF2</i>     | TTGGGACTACTGGAGAGCGT | GGGACACGTCAGACTCTGTG  | 103                       |
| <i>LpHistone3</i> | CCCTCCGTGAAATTCGCAAG | GGCTCTGGAACCTCAGATCG  | 147                       |
| <i>SpCBF1</i>     | ACCTGGCCAACATGAGGATG | CGCCACGTCAGATGGAGTAG  | 132                       |
| <i>SpCBF2</i>     | GAGAGCTCGAGGATGCCTTC | CAGAGGGACACGTCGGATTC  | 107                       |
| <i>SpHistone3</i> | CGCAAGTACCAGAAGAGCAC | CGAAGAGACCCACGAGGTAG  | 160                       |
| <i>SpActin</i>    | TGTTTTCCCAAGTATCGTC  | TCCCAGTTGGTGACGATT    | 153                       |
